# Supplementary material
Source: PubMed Central journal article supplement (PMC5480620)
Supplement: NIHMS864750-supplement.pdf [file NIHMS864750-supplement.pdf]

Supplementary Material:

Any available standardized neurodevelopmental testing were collected, including the Brief Infant Toddler Social Emotional Assessment<sup>1</sup>, Receptive-Expressive Emergent Language Test Third Edition<sup>2</sup>, Bruininks-Oseretsky Test of Motor Proficiency Second Edition<sup>3</sup>, Peabody Developmental Motor Scales Second Edition<sup>4</sup>, Beery-Buktenica Developmental Test of Visual-Motor Integration<sup>5</sup>, Ages and Stages Questionnaires<sup>6</sup>, Child Behavior Checklist<sup>7</sup>, Preschool Language Scales Fifth Edition<sup>8</sup>, Wechsler Preschool and Primary Scale of Intelligence<sup>9</sup> and Autism Diagnostic Observation Schedule<sup>10</sup>.

1. Briggs-Gowan MJ, Carter AS. BITSEA Brief Infant-Toddler Social and Emotional Assessment. San Antonio, TX: Harcourt Assessment Inc; 2006.
2. Bzoch KR, League R, Brown VL. Receptive-expressive Emergent Language Test: Examiner's Manual. Pro-ed; 2003.
3. Bruininks RH. Bruininks-Oseretsky Test of Motor Proficiency, (BOT-2). Minneapolis, MN: Pearson Assessment. 2005.
4. Folio MR, Fewell RR. Peabody developmental motor scales: Examiner's manual. Pro-ed; 2000.
5. Beery KE. The Beery-Buktenica Developmental Test of Visual-motor Integration: Beery VMI, with Supplemental Developmental Tests of Visual Perception and Motor Coordination, and Stepping Stones Age Norms from Birth to Age Six: Administration, Scoring and Teaching Manual. Minneapolis, MN: NCS Pearson; 2004.
6. Squires J, Bricker D. Ages & Stages Questionnaires®, Third Edition (ASQ- 3(TM)): A Parent-Completed Child Monitoring System. 3rd ed. Baltimore, MD: Brookes Publishing; 2009.
7. Achenbach TM. Integrative guide for the 1991 CBCL/4-18, YSR, and TRF profiles. Department of Psychiatry, University of Vermont; 1991.
8. Zimmerman IL, Steiner VG, Pond RE. Preschool language scale. Psychological Corporation; 2002.
9. Wechsler D. WPPSI-III administration and scoring manual. Psychological Corporation; 2002.
10. Lord C, Rutter M, DiLavore P, Risi S, Gotham K, Bishop SL. Autism diagnostic observation schedule (ADOS) manual. Los Angeles, CA: Western Psychological Services. 1999.
